# Supplementary material
Source: MDPI journal article supplement (https://www.mdpi.com/2311-5637/8/8/379)

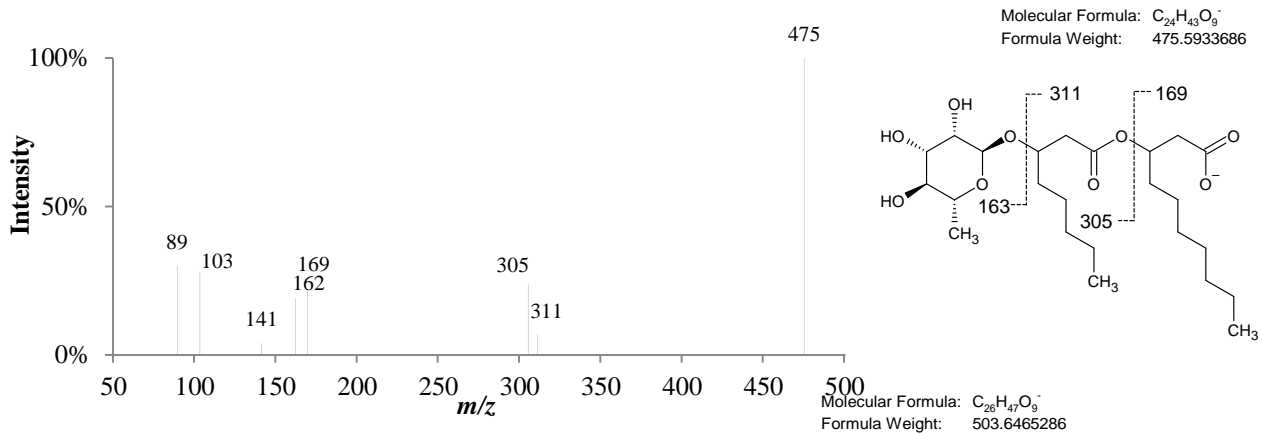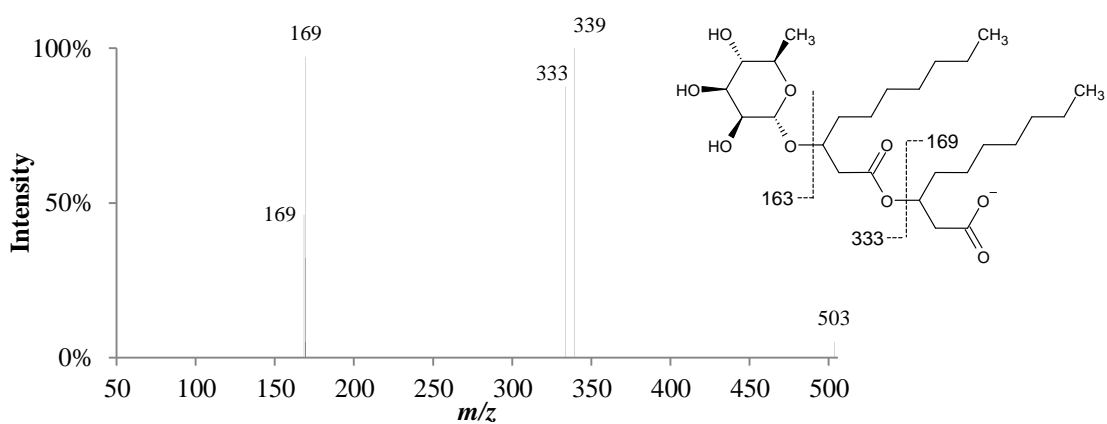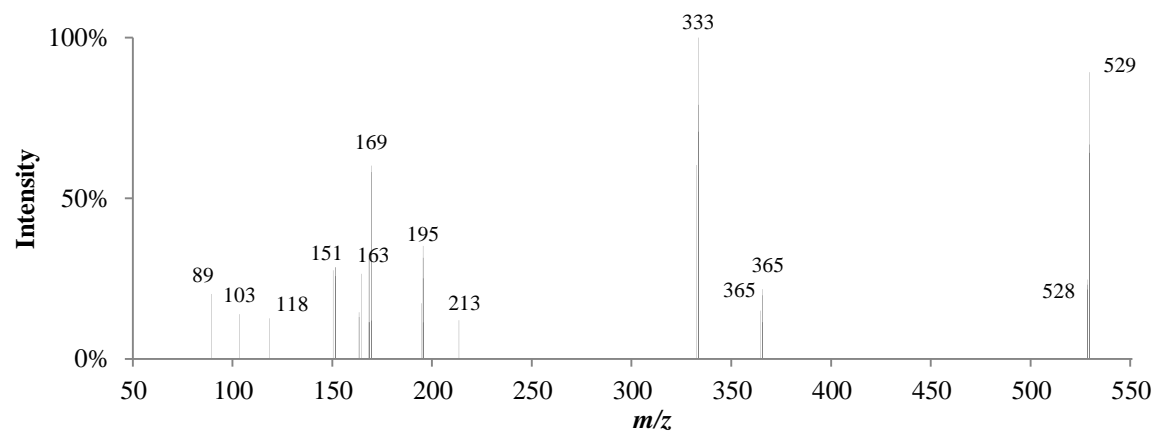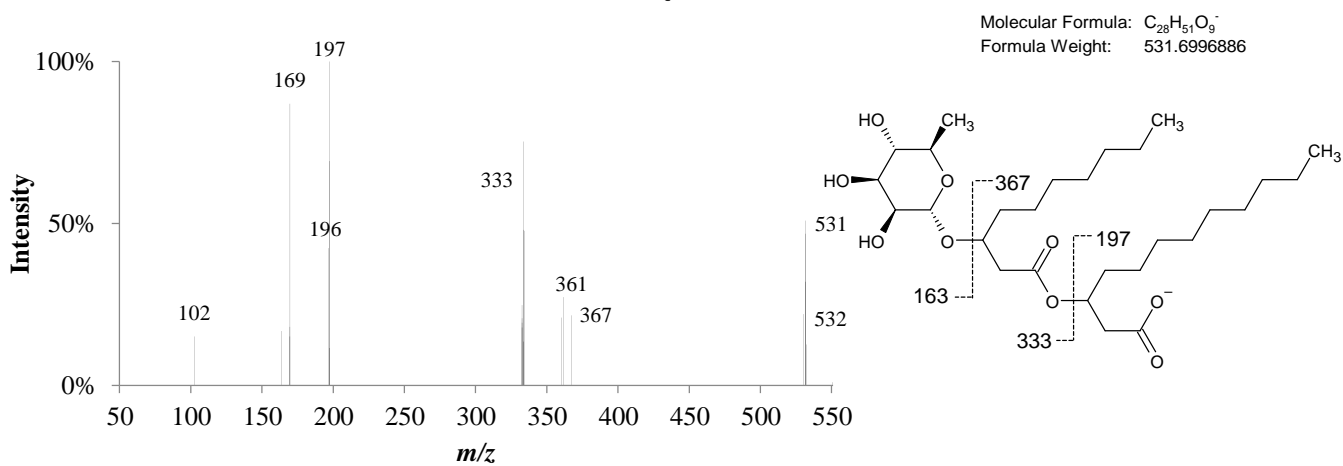

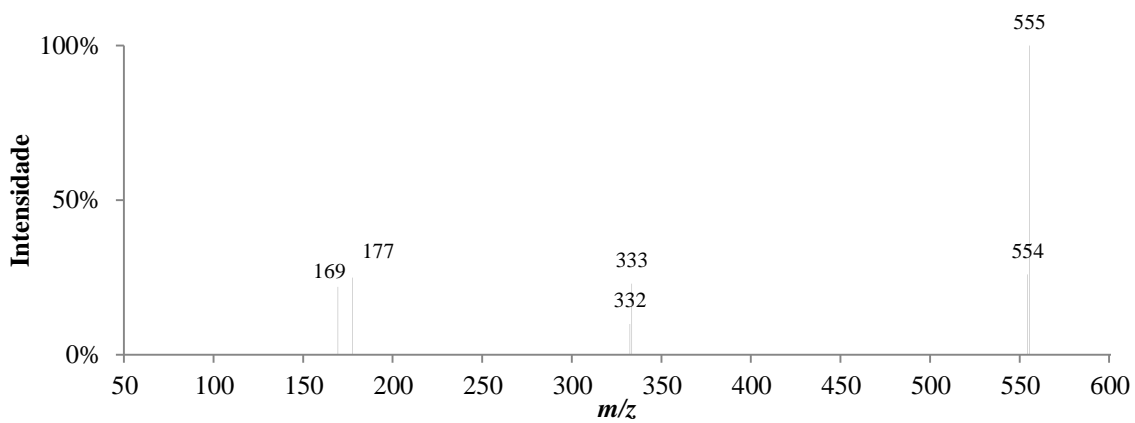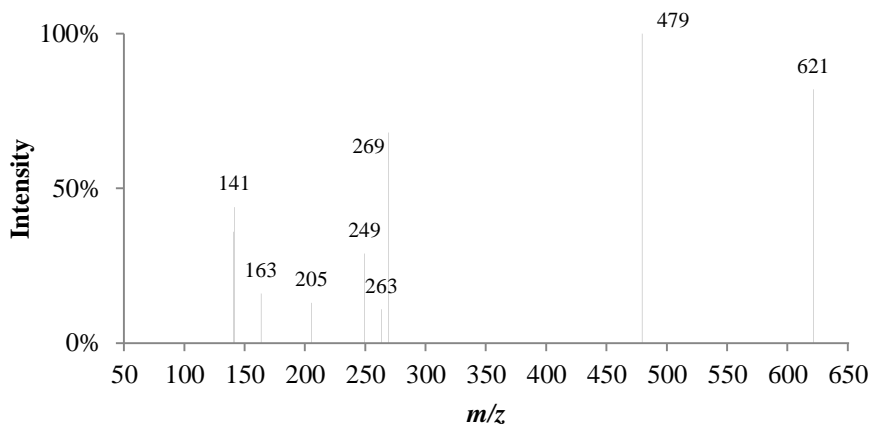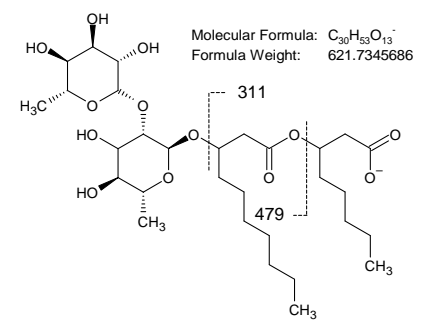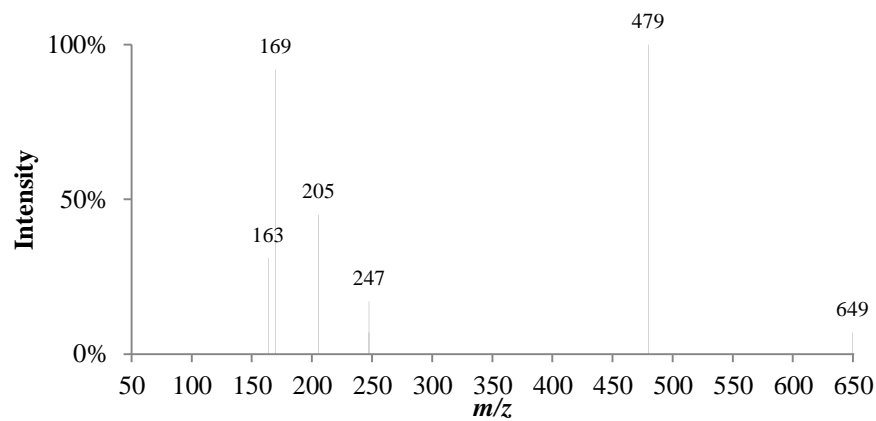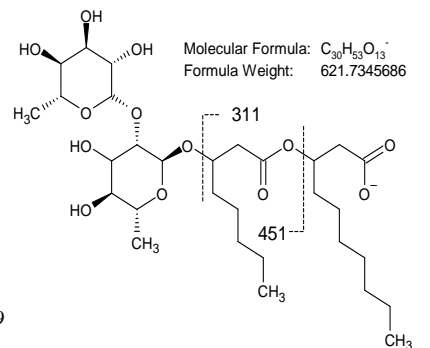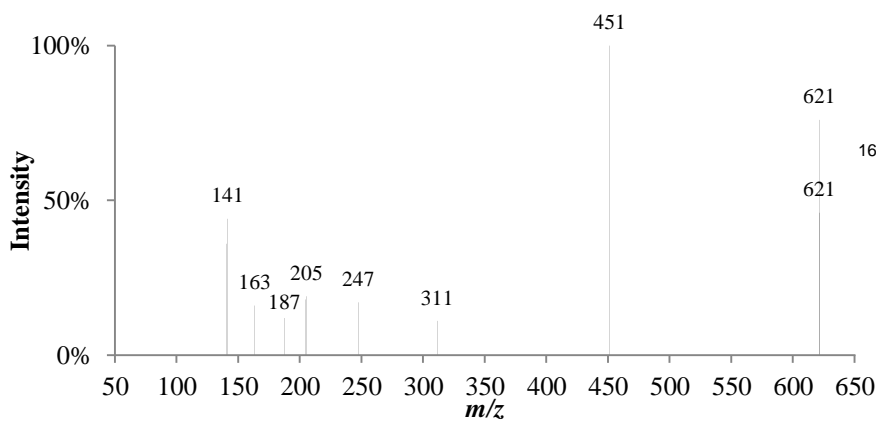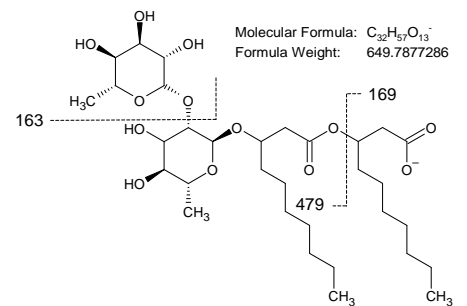

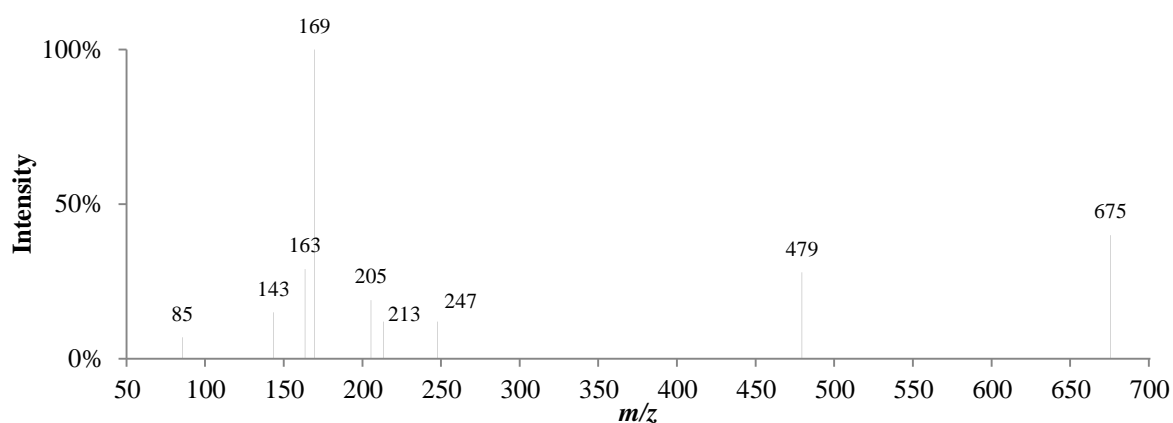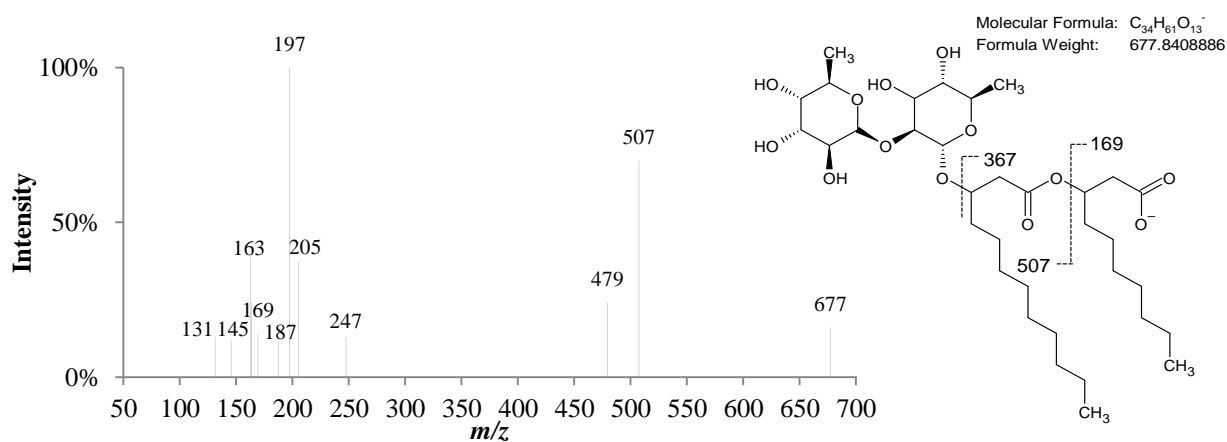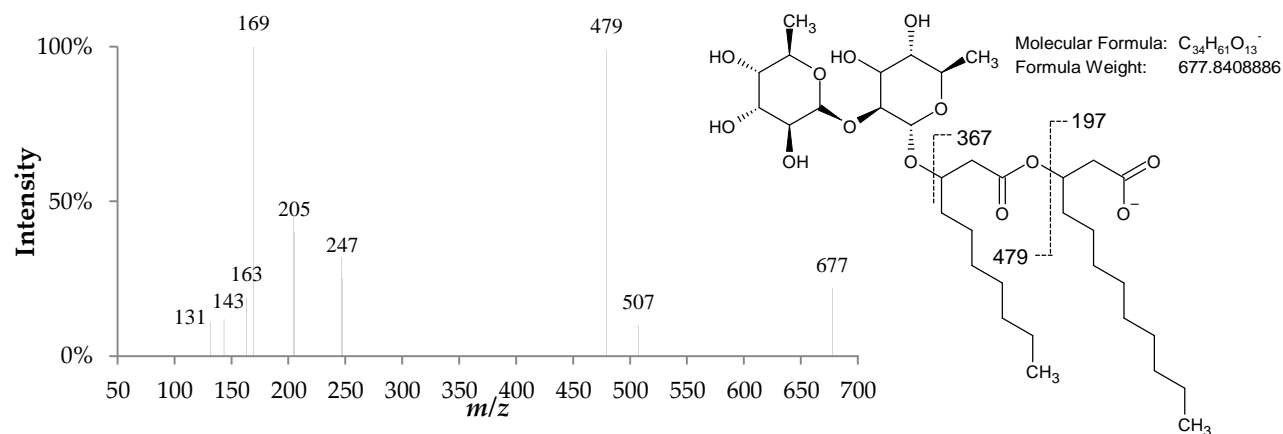

Figure S1 - Fragmentation of rhamnolipid ions by ESI (-) MS/MS from RL samples by guava oil.

Supplement: s1 [file s1]
